1 **Trend, multivariate decomposition and spatial distribution of perinatal mortality in**  
2 **Ethiopia using further analysis of EDHS 2005-2016.**

3 Muluken Chanie Agimas<sup>1\*</sup>, Demewoz Kefale<sup>2</sup>, Tigabu Kidie Tesfie<sup>1</sup>, Demewoz Kefale<sup>2\*</sup>,  
4 Worku Necho<sup>3</sup>, Tigabu Munye<sup>4</sup>, Gedefaw Abeje<sup>7</sup>, Yohannes Tesfahun<sup>5</sup>, Amare Simegn<sup>6</sup>,  
5 Amare kassaw<sup>2</sup>, Shegaw Zeleke<sup>4</sup>, Solomon Demis<sup>3</sup>, Habtamu Shimels Hailemeskel<sup>8</sup>

6 <sup>1</sup> Department of Epidemiology and Biostatistics, institute of public health, college of  
7 medicine and health science, University of Gondar, Gondar, Ethiopia.

8 <sup>2</sup> Debre Tabor University, College of Health sciences, Department of pediatrics and child  
9 health Nursing, Debre Tabor, Ethiopia

10 <sup>3</sup> Debre Tabor University, College of Health science, Department of maternal and neonatal  
11 health nursing, Debre Tabor, Ethiopia

12 <sup>4</sup> Debre Tabor University, College of Health sciences, Department of Adult health nursing,  
13 Debre Tabor, Ethiopia

14 <sup>5</sup> Debre Tabor University, College of Health sciences, Department of Emergency and critical  
15 health nursing, Debre Tabor, Ethiopia

16 <sup>6</sup> Debre Tabor University, College of Health sciences, Department of Reproductive health,  
17 Debre Tabor, Ethiopia

18 <sup>7</sup> Debre Tabor Health science college, Debre Tabor, Ethiopia.

19 <sup>8</sup> Department of Pediatrics and Neonatal nursing, college of health science, Debre Tabor  
20 University, Debre Tabor, Ethiopia.

21 **Address of the Authors:**

22 Muluken Chanie Agimas (MCA): [mulukensrc12@gmail.com](mailto:mulukensrc12@gmail.com)

23 Demewoz Kefale (DK). [demewozk@yahoo.com](mailto:demewozk@yahoo.com)

24 Tigabu Kidie Tesfie (TKT): [tigabukidie@gmail.com](mailto:tigabukidie@gmail.com)

25 Worku Necho (WN): [workunecho@gmail.com](mailto:workunecho@gmail.com)

26 Tigabu Munye (TM): [tigabumunye21@gmail.com](mailto:tigabumunye21@gmail.com)

27 Yohannes Tesfahun (YT): [tesfahunyohannes08@gmail.com](mailto:tesfahunyohannes08@gmail.com)

28 Amare Simegn (AS): [amaresimegn99@gmail.com](mailto:amaresimegn99@gmail.com)

29 Amare Kassaw (AK): [amarekassaw2009@gmail.com](mailto:amarekassaw2009@gmail.com)

30 Shegaw Zeleke (SZ): [shegawzn@gmail.com](mailto:shegawzn@gmail.com)

31 Gedefaw Abeje (GA): [gede.abeje@gmail.com](mailto:gede.abeje@gmail.com)

32 Solomon Demis (SD): [solomondemis@gmail.com](mailto:solomondemis@gmail.com)

33 Habtamu Shimels Hailemeskel (HSM): [habtamushimels21@gmail.com](mailto:habtamushimels21@gmail.com)

34 **Corresponding author:** Muluken Chanie Agimas (MCA): [mulukensrc12@gmail.com](mailto:mulukensrc12@gmail.com)

35

36

37

38

39

40

41

## 42 **Abstract**

43 **Background:** Perinatal mortality is the global health problem, especially Ethiopia has the  
44 highest perinatal mortality rate. Studies about perinatal mortality were conducted in  
45 Ethiopia, but which factors specifically contribute to the change in perinatal mortality  
46 across time is unknown.

47 **Objectives:** To assess the trend, multivariate decomposition and spatial analysis of  
48 perinatal mortality in Ethiopia using EDHS 2005 to 2016.

49 **Methods:** A community-based cross-sectional study design was used. EDHS 2005-2016  
50 data was used and weighting has been applied to adjust the difference in the probability of  
51 selection. Logit based multivariate decomposition analysis was used using STATA version  
52 14.1. Moran's I statistics using ArcGIS was also used to identify the significant clustering  
53 of perinatal mortality.

54 **Result:** The trend of perinatal mortality in Ethiopia decreased from 37 per 1000 births in  
55 2005 to 33 per 1000 births in 2016. About 83.3% of the decrease in perinatal mortality in  
56 the survey was attributed to the difference in the endowment (composition) of the women.  
57 Among the differences in the endowment, the difference in the composition of ANC visits,  
58 take TT vaccine, urban residence, occupation, secondary education, birth attendant  
59 significantly decreased the perinatal mortality in the last 10 years. Among the differences  
60 in coefficients, skilled birth attendant significantly decreased the perinatal mortality. The  
61 spatial distribution of perinatal mortality was randomly distributed.

62 **Conclusion:** The perinatal mortality in Ethiopia has declined over time. Variables like  
63 ANC visit, taking TT vaccine, urban residence, have occupation, secondary education and  
64 skilled birth attendant reduce perinatal mortality. Perinatal mortality was distributed

- 65 randomly in Ethiopia. To reduce perinatal mortality more, scaling-up the maternal and
- 66 newborn health services has a critical role.
- 67 **Key word:** perinatal mortality, decomposition analysis, trend, spatial analysis, Ethiopia.

## 68 **Introduction**

69 Perinatal mortality is the death of a fetus starting at 28 weeks of gestation and newborn death up  
70 to 7 days after delivery (1, 2). The well-being of women and newborns can be measured by  
71 perinatal mortality (3). Goals are set by the world health organization and sustainable development  
72 goals to reduce the death of newborns by 2030 to less than 12 per 1000 live births (4, 5). By 2020,  
73 Ethiopia set up a plan to reduce perinatal mortality (PM) using improving maternal and newborn  
74 health services, such as improving antenatal care utilization, iron supplementation, and skilled  
75 delivery (6). Even though a lot of work has been done, the PM is still a major public health issue  
76 and a devastating problem.

77 About 6.3 million global PM are reported each year (3) and from this figure, 98% of the PM  
78 reported was from developing countries, especially in sub-Saharan African countries. PM is the  
79 most challenging problem (7). The geographic distribution of PM in Africa was in East Africa 58  
80 per 1000 births, in middle Africa 75 per 1000 births, in Northern Africa 34 per 1000 births, in  
81 Southern Africa 37 per 1000 births, and in western Africa 76 per 1000 births (3). Among the sub-  
82 Saharan African countries, Ethiopia has the highest PM ranges from 66 to 124 per 1000 and 37 to  
83 52 per 1000 total births in the health community-based setting respectively (11). Among the most  
84 critical times of maternal and newborn death, the first hour and week of delivery contribute to the  
85 highest death rate (8). To measure the reliable figure of mortality during delivery, PM is a more  
86 comprehensive indicator than the neonatal mortality indicator (9, 10).

87 The PM has several consequences. For example, psychological problems (depression, suicidal  
88 behavior) reduce work productivity because of grieving and negatively affect couples'  
89 relationships (11, 12). Other mental disorders like anxiety/stress and poor partnership are also

90 associated with perinatal loss (13). Quality of care during birth can save about three million still  
91 births and newborns each year (4).

92 Although interventions are implemented in Ethiopia to reverse the impact of the PM, the PM is  
93 still the most challenging public health problem (14). As different evidence shows; age, delivery  
94 place, sex of the child, residence of the women, antenatal care utilization status and source of  
95 drinking water were the significant factors for PM (15-18). Even though the PM is a critical  
96 problem in Ethiopia, the spatial distribution of the problem, the trend of PM using national level  
97 data (Ethiopian demographic health survey data), and the factors for the trend of PM were not  
98 addressed using decomposition analysis. Additionally, most studies about PM were conducted at  
99 health institution level but there are no adequate studies at the community level about the trend  
100 and spatial distribution of PM in Ethiopia. Therefore, the current study aimed to assess the spatial  
101 distribution, trend and determinants of the PM in Ethiopia using further analysis of Ethiopian  
102 demographic health survey (EDHS) 2005-2016 data set using decomposition and spatial analysis.

103

104

105

106

107

108

109

110

111

112

## 113 **Objectives**

114 To determine the spatial distribution of perinatal mortality in Ethiopia using 2005 and 2011 EDHS  
115 data

116 To determine the trend of perinatal mortality in Ethiopia using EDHS 2005-2016 data.

117 To identify the factors attributed to the change in perinatal mortality in Ethiopia using  
118 decomposition analysis

## 119 **Methods**

### 120 **Data**

121 The EDHS data set of 2005, 2011 and 2016 were used for the intended analysis using community  
122 based Crosssectional study design. These demographic surveys used stratified two stage cluster  
123 sampling techniques. For EDHS-2005, the sampling frame was developed based on the 1994  
124 Ethiopian population and housing census. For EDHS-2011 and EDHS-201, the 2007 Ethiopian  
125 population and housing census was used for sampling frame preparation. Geographical areas or  
126 urban and rural areas were used for stratification purposes. About 21 sampling strata were used  
127 for the survey. A total of 540, 624 and 645 enumeration areas with independent and probability  
128 proportional for the enumeration areas were selected for EDHS-2005, 2011 and 2016 respectively.  
129 Then house hold listing and selection was conducted before the actual data collection procedure  
130 and, on average, 28 households in the enumeration areas were selected using systematic sampling.  
131 The detailed selection process was reported in EDHS-2005, EDHS-2011 and EDHS-2016 (19-21).  
132 A total of 33,998 sample size was used in all surveys (EDHS-2005=12035, EDHS-2011=10588,  
133 EDHS-2016=11375).

### 134 **Study and source population**

135 The study population was all births from reproductive-age women in Ethiopia. Whereas, the study  
136 population was the selected enumeration areas in Ethiopia.

137 **Outcome of interest**

138 Perinatal mortality (Yes, No)

139 **Operational definition**

140 Perinatal mortality is the death of a fetus starting at 28 weeks of gestation and newborn death up  
141 to 7 days after delivery (1, 2).

142 **Data collection procedure**

143 The EDHS data set was used for the current study. This data was accessed by requesting the DHS  
144 program website [www.measuredhs.com](http://www.measuredhs.com) and by explaining the ultimate objective of the current  
145 study. The raw data was collected from reproductive age women who gave birth using a pretested  
146 structured questionnaire. The data was extracted from birth records of the three consecutive EDHS  
147 data sets (2005-2016).

148 **Data management analysis**

149 Before descriptive and analytical analysis, data were weighted using sampling weight techniques  
150 to be more representative. To describe the study subjects/ participants, descriptive measures like  
151 cross tabulation was used using STATA version-14. After important predictors are cleaned, coded  
152 and extracted, then EDHS 2005, 2011, 2016 data sets were merged together for further spatial  
153 trend and decomposition analysis. The Moran I statistics were analyzed using ArcGIS software  
154 version 10.3. The spatial distribution of perinatal mortality was analyzed for EDHS 2005 and 2011.  
155 Because spatial distribution for EDHS 2016 was already conducted from the previous study (22).

156 **Trend and decomposition analysis**

157 To assess the trend of perinatal mortality, descriptive analysis was used using selected variables  
158 and a combination of EDHS data separately (2005–2011, 2011–2016, and 2005–2016). To  
159 determine the trend of perinatal mortality changes and the possible contributing predictors and the



160 source of difference in perinatal mortality percentage in Ethiopia from 2005-2016, multivariate  
161 decomposition analysis was employed. Two important components, such as the composition of  
162 the population and the coefficient, were considered to be the contributing factors for the decreasing  
163 or increasing pattern of perinatal mortality in Ethiopia since 2005 to 2016. The logit based  
164 multivariate decomposition analysis was used to identify the possible factors for the trend of  
165 perinatal mortality in Ethiopia. The Logit based decomposition was using the STATA command  
166 `mvdcmp` (23). The observed difference in perinatal mortality between the surveys decomposed in  
167 to endowment (E) and coefficient (C) components. The endowment (E) means the difference in  
168 characteristics, whereas the coefficient (C) means the difference in effects.

### 169 **Spatial autocorrelation**

170 The ArcGIS v-10.3 software was used to estimate Moran's I spatial autocorrelation perinatal  
171 mortality in Ethiopia using EDHS 2005 and 2011 because spatial distribution using EDHS 2016  
172 was conducted. The value of Moran's I ranges from -1 to +1 and the value of -1 infers the dispersed  
173 variation of perinatal mortality. Whereas, +1 indicates that the clustered perinatal mortality and 0  
174 Moran's I test value showed the random distribution of perinatal mortality. To declare the statistical  
175 significance of the Moran's spatial autocorrelation, a p-value of less than 0.05 was considered.  
176 Finally, the spatial autocorrelation was not statistically significant and the assumption of further  
177 spatial analysis was violated.

## 178 **Results**

### 179 **Socio-demographic characteristics of the participants**

180 In all surveys, 16853 (49.6%) of the participants were aged 20-29 years. Regarding employment  
181 status, there was a slight decrement in no work (unemployment) from 2177 (18.1%) in 2005  
182 EDHS, to 1457 (12.8%) in 2016 EDHS. From all surveys, about 18439 (54.2%) participants have  
183 had an occupation. Additionally, relatively the highest 4997 (43.9%) of the participants were

184 included in the 2016 EDHS. Furthermore, the majority of participants, 24551 (72.2%) those who  
185 were included in the three surveys, had no education and there was a decrement from 9541(79.3%)  
186 in 2005 to 7606 (66.9%) in 2016 (**Table-1**).

### 187 **The trend of perinatal mortality rate in Ethiopia**

188 The rate of perinatal mortality in Ethiopia has significantly decreased from a 37 death rate per 1000  
189 births in 2005 to a 33 death rate per 1000 births in 2016 (**Figure-1**).

### 190 **Environmental and health service related characteristics**

191 About 11154 (92.7%), 9182 (86.7%) and 10750 (94.5%) of the participants used toilet facilities in  
192 2005, 2011 and 2016 respectively, and there was an increment in toilet facility utilization from  
193 11154 (92.7%) in 2005 to 10750 (94.5%) in 2016. Skilled births were increased from 5147 (51%)  
194 in 2005 to 6563 (62%) in 2011 to 8697 (76.5%) in 2016. The overall ANC utilization in all surveys  
195 was 20635 (61%) and the magnitude was increased from 43.3% in 2005 to 61.6% in 2011 to 78.2%  
196 in 2016 (**Table-2**).

### 197 **Fetal and neonatal related characteristics**

198 The majority of the births, 10836 (90%) in 2005, 9602 (90.7%) in 2011 and 10186 (89.5%) in  
199 2016 were single. More than half of 23447 (69%) the births interval in all survey was 24 months  
200 and above. Furthermore, there was a decrement in cigarette smoking from 256 (21.3%) in 2005 to  
201 189 (17.8%) in 2011 and 126 (1.1%) in 2016 (**Table-3**).

202

203

### 204 **Trends of perinatal mortality rate by women characteristics**

205 The trend of perinatal mortality rate by women's characteristics in Ethiopia from 2005-2016 EDHS  
206 showed that there was a decline in perinatal mortality in urban residences across all surveys from  
207 23.3 per 1000 births in 2005 to 16.6 per 1000 births in 2011 and 6.6 per 1000 in 2016. Regarding

208 the regional distribution of perinatal mortality rate, in the Amhara region, the trend decline across  
209 all phases in 2005-2011 (phase-I) declined by 29.9 per 1000 births. In 2011-2016 (phase-II),  
210 declined by 10.6 per 1000 births and the maximum amount of change was observed in phase III  
211 (2005-2016) which was declined by a death rate of 40.5 per 1000 births. Furthermore, the trend  
212 of perinatal mortality rate by women aged less than 20 years showed that in phase I (2011-2005)  
213 it was decreased by 1.6 per 1000 births, in phase III (2016-2011) by 3.4 per 1000 births and by 5  
214 per 1000 births in phase III (2016-2005) (**Table-4**).

### 215 **Spatial distribution of perinatal mortality in Ethiopia**

216 Before conducting spatial interpolation, Sat scan analysis, hot/cold spot analysis and other spatial  
217 analysis, the spatial autocorrelation analysis (global Moran's I test) was conducted on EDHS 2005  
218 and 2011. Thus, the global Moran's I test, evidenced that the spatial distribution of perinatal  
219 mortality in Ethiopia was randomly distributed. The Moran's I, z-value and p-value of perinatal  
220 mortality distribution (for EDHS-2005: Moran's I = -0.05771, Z-value= -0.269571, p-value=  
221 0.787490, for EDHS-2011: Moran's I= -0.027777, Z-value= -0.473613, p-value= 0.635776) (**fig-2**  
222 **and fig-3**). This finding implies that perinatal mortality in Ethiopia was not clustered or the  
223 distribution was just random. Therefore, further spatial analysis was impossible to conduct.

### 224 **Over all decomposition analysis**

225 The overall perinatal mortality in Ethiopia has significantly decreased from 2005 to 2016. As the  
226 overall decomposition (2005-2016) analysis showed, the decrement of perinatal mortality in  
227 Ethiopia was explained by the endowment of the women between each EDHS. Thus, around 83.3  
228 % of the perinatal mortality decline was because of the endowment (composition) of the  
229 participants and which was statistically significant. The rest was attributed to the change in the  
230 coefficients (C) (**Table-5**).

## 231 Detailed decomposition analysis

232 Among the difference in the endowment; the difference in the composition of ANC visit ( $B = -$   
233  $0.002164$ , 95%CI;  $-0.0035$ ,  $-0.00358$ ,  $p\text{-value}=0.001$ ), take one TT dose ( $B = -0.00072$ , 95% CI;  $-$   
234  $0.0012$ ,  $-0.0011$ ,  $p\text{-value}=0.007$ ),  $\geq 2$  TT vaccine ( $B = -0.0019$  95% CI;  $-0.0028$ ,  $-0.0011$ ,  $p\text{-}$   
235  $\text{value} < 0.001$ ), Urban residence ( $B = -0.000499$ , 95% CI;  $-0.0009$ ,  $-0.00007$ ,  $p\text{-value}=0.02$ ), have  
236 occupation ( $B = -0.019$ , 95%CI;  $-0.0033$ ,  $-0.00061$ ,  $p\text{-value}= 0.004$ ), secondary education ( $B =$   
237  $0.0023$ , 95% CI;  $0.000046$ ,  $0.0041$ ,  $p\text{-value}=0.014$ ), skilled birth attendant ( $B = 0.0069$ , 95% CI;  
238  $0.00068$ ,  $0.013$ ,  $p\text{-value}= 0.03$ ) were significantly decrease the perinatal mortality in the last 10  
239 years. Among the differences in coefficients, skilled birth attendant ( $B = 0.000099$ , 95% CI;  
240  $0.00002$ ,  $0.00018$ ,  $p\text{-value}=0.013$ ) significantly decreased the perinatal mortality (**Table-6**).

## 241 Discussion

242 Perinatal mortality is the most devastating issue in Ethiopia. But the trend, spatial distribution and  
243 what factors contributed to the increment or decrement of perinatal mortality were not studied.  
244 Thus, in this study, an attempt has been made to assess the trend, multivariate decomposition and  
245 spatial distribution of perinatal mortality in Ethiopia.

246 The trend of perinatal mortality in Ethiopia has decreased over time from 37 deaths per 1000 births  
247 in 2005 to 34 deaths per 1000 births in 2016. This was supported by a systematic review and meta-  
248 analysis conducted in Ethiopia (24). This may be because the Ethiopian government gave an  
249 emphasis on maternal and child health services by strengthening the health extension program and  
250 by exempting the service (25). The other possible reason might be associated with the numbers of  
251 skilled birth attendants and the basic service coverage like ANC, post-natal care service, family  
252 planning service, and institutional delivery service in Ethiopia increased over time, which enabled

253 the women to get counseling about their pregnancy, their health, fetal condition, birth  
254 preparedness, nutrition and other important messages (26, 27).

255 As Moran's I statistics test value showed, the spatial distribution of perinatal mortality in Ethiopia  
256 was not clustered or the pattern of perinatal mortality in Ethiopia was a result of random chance.  
257 Regarding the multivariate decomposition findings, the overall contribution of women's  
258 composition for perinatal mortality in the entire survey (2005-2016) was 83.3%. As an increase in  
259 the endowment of urban resident women over the survey, there was a significant decrease in  
260 perinatal mortality in Ethiopia. This may be because the expansion of urbanization in Ethiopia  
261 may increase the chance of getting maternal and child health services and access to health  
262 information more than rural women (28, 29).

263 The increase in the women's composition of ANC utilization over the survey also had a significant  
264 effect on the decrement in perinatal mortality in Ethiopia. This may be because women who visit  
265 for ANC service are more likely to give live birth and children have more survival than women  
266 who have no history of ANC service (30). An increase in taking the TT vaccine (taking one or  
267 more TT vaccines) over the survey decreased the perinatal mortality significantly. The possible  
268 reason that might be associated with improving the TT vaccination coverage could be to  
269 substantially increase the number of newborns protected at birth than their counterparts and  
270 subsequently reduce the number of newborn deaths (31). The other possible reason might be  
271 because those women who take the TT vaccine are more likely to access other health services like  
272 education about pregnancy complications, danger signs, nutrition counselling and other key  
273 messages.

274 An increase in women who had occupations also had a significant effect on the reduction of  
275 perinatal mortality in Ethiopia. This might be because women who have an occupation are more

276 likely to become employed and live in a better socio-economic condition and this leads to better  
277 household food security and may reduce maternal malnutrition and its complications (32). The  
278 other possible reason might be that women who have an occupation are more likely to have better  
279 knowledge and educational status than those who have no occupation. Thus, better knowledge and  
280 educational background is a key to having better information about their health and having good  
281 health-seeking behavior for maternal and child health services.

282 In the current study, an increase in endowment of women with secondary education also  
283 significantly reduced the perinatal mortality compared to women with no education. This might  
284 be due to women with better educational status, which may increase the chance of having better  
285 health information, better nutrition, and better health-seeking behavior than those women who  
286 have no education in return, which improves infant survival and healthy maternal condition (33).  
287 Furthermore, an increase in the endowment (composition) of women who give birth with the  
288 assistance of a skilled birth attendant significantly reduces the perinatal mortality compared to  
289 women who give birth to a non-skilled birth attendant. Regarding the difference of coefficient,  
290 giving birth by a skilled birth attendant also significantly contributed to the reduction of perinatal  
291 mortality in Ethiopia. The finding was consistent with a systematic and meta-analysis study and a  
292 study conducted in the United States of America (34, 35). This can be justified by women who  
293 give birth by skilled birth attendant are get better delivery care than the counterparts. This can be  
294 justified by women who give birth by skilled birth attendants are get better delivery care than the  
295 counterparts. This could reduce the chance of newborn death by sepsis, hypothermia, prolonged  
296 labor and other complications during giving birth. The limitation of the study was some of the  
297 most important variables such as clinical data, maternal medical and obstetric condition and RH

298 incompatibility, were missed in the EDHS data. So further study by considering the above factors  
299 is very important.

### 300 **Conclusion**

301 The trend of perinatal mortality in Ethiopia has declined across time. The change in women's  
302 endowment contributes to more than a third quarter of the perinatal mortality decrease. Among the  
303 change in women's endowment, variables such as the uptake of the TT vaccine, skilled birth  
304 attendant, secondary education, occupation and ANC utilization, contributed to the decline of PM.  
305 From the change in difference coefficients, give birth by a skilled birth attendant was the  
306 significant predictor for the decline of PM in Ethiopia. To further reduce the PM, scaling-up the  
307 maternal health service has an abundant advantage. The finding has an implication for designing  
308 PM reduction strategies and wise allocation of resources for the interventions.

### 309 **Ethical declaration**

#### 310 **Ethical approval and consent to participate**

311 Ethical approval from individual participants was not obtained because of secondary data. Rather  
312 permission was obtained from DHS international to access the data.

#### 313 **Consent for publication**

314 it is not applicable

#### 315 **Data availability statement**

316 All data are accessed in the article

#### 317 **Conflict of interest**

318 All authors declare that no conflict of interest

319 **Funding**

320 No funding source.

321 **Acknowledgments**

322 The authors would like to give thanks to DHS international for giving permission to utilize the  
323 data.

324 **Contribution of the Authors**

325 **Conceptualization:** Muluken Chanie, Solomon Demis, Worku Necho, Habtamu Shimels  
326 Hailemeskel

327 **Data curation:** Solomon Demis, Amare Simegn, Tigabu Munye, Yohannes Tesfahun

328 **Formal analysis:** Muluken Chanie Agimas, Amare Kassaw, Amare Simegn, Demewoz Kefale

329 **Investigation:** Muluken Chanie Agimas, Tigabu Kidie, Tigabu Munye, Yohannes Tesfahun

330 **Methodology:** Muluken Chanie Agimas, Demewoz Kefale, Worku Necho, Gedefaw Abeje

331 **Software:** Muluken Chanie Agimas, Yohannes Tesfahun, Amare Simegn, Shegaw Zeleke,  
332 Habtamu Shimels Hailemeskel

333 **Supervision:** Muluken Chanie Agimas, Habtamu Shimels Hailemeskel

334 **Visualization:** Shegaw Zeleke, Solomon Demis, Tigabu Munye, Tigabu Kidie, Yohanes  
335 Tesfahun, Worku Necho, Demewoz Kefale, Gedefaw Abeje

336 **Writing – original draft:** Muluken Chanie Agimas, Solomon Demis, Shegaw Zeleke, Gedefaw  
337 Abeje

338 **Abbreviation and acronym**

339 ANC.....Antenatal Care

340 DHS.....Demographic Health Survey

341 EDHS.....Ethiopian Demographic Health Survey



342 PM.....Perinatal Mortality

343 TT.....Tetanus Toxoid

## 344 **Reference**

- 345 1. Central Statistical Agency (CSA) [Ethiopia], and ICF. Ethiopia Demographic and Health  
346 Survey 2016. Addis Ababa, Ethiopia, and Rockville, Maryland, USA: CSA and ICF. 2016.
- 347 2. Croft TN, Marshall AM, Allen CK, Arnold F, Assaf S, Balian S. Guide to DHS statistics.  
348 Rockville: ICF. 2018.
- 349 3. "World Health Organization". Neonatal and perinatal mortality: country, regional and  
350 global estimates. 2006.
- 351 4. "World Health Organization". Every newborn: an action plan to end preventable deaths.  
352 2014.
- 353 5. CEPAL N. The 2030 Agenda and the Sustainable Development Goals: An Opportunity for  
354 Latin America and the Caribbean. 2018.
- 355 6. "Federal Democratic Republic Of Ethiopia Ministry Of Health ". National Reproductive  
356 Health Strategy 2016 [Available from: URL:[https://www.prb.org/wp-  
357 content/uploads/2020/06/Ethiopia-National-Reproductive-Health-Strategy-2016-2020.pdf](https://www.prb.org/wp-content/uploads/2020/06/Ethiopia-National-Reproductive-Health-Strategy-2016-2020.pdf).
- 358 7. Children St. Ending newborn deaths: ensuring every baby survives. Save the Children  
359 London; 2014.
- 360 8. "World Health Organization". WHO technical consultation on postpartum and postnatal  
361 care. 2010.
- 362 9. Chinkhumba J, De Allegri M, Muula AS, Robberstad BJBph. Maternal and perinatal  
363 mortality by place of delivery in sub-Saharan Africa: a meta-analysis of population-based cohort  
364 studies. 2014;14(1):1-9.
- 365 10. Commission NP. Nigeria demographic and health survey 2013. National Population  
366 Commission, ICF International; 2013.
- 367 11. Fernández-Sola C, Camacho-Ávila M, Hernández-Padilla JM, Fernández-Medina IM,  
368 Jiménez-López FR, Hernández-Sánchez E, et al. Impact of perinatal death on the social and family  
369 context of the parents. International journal of environmental research and public health.  
370 2020;17(10):3421.
- 371 12. Gausia K, Moran AC, Ali M, Ryder D, Fisher C, Koblinsky M. Psychological and social  
372 consequences among mothers suffering from perinatal loss: perspective from a low income  
373 country. BMC Public Health. 2011;11(1):451.
- 374 13. Hutti MH, Armstrong DS, Myers JA, Hall LA. Grief intensity, psychological well-being,  
375 and the intimate partner relationship in the subsequent pregnancy after a perinatal loss. Journal of  
376 Obstetric, Gynecologic & Neonatal Nursing. 2015;44(1):42-50.
- 377 14. Federal MaCHD, Ministry of Health". National Strategy for Newborn and Child Survival  
378 in Ethiopia 2015 [Available from: [https://www.healthynewbornnetwork.org/hnn-  
379 content/uploads/nationalstrategy-for-newborn-and-child-survival-in-ethiopia-201516-  
380 201920.pdf](https://www.healthynewbornnetwork.org/hnn-content/uploads/nationalstrategy-for-newborn-and-child-survival-in-ethiopia-201516-201920.pdf).

- 381 15. Ezeh OK, Uche-Nwachi EO, Abada UD, Agho KE. Community-and proximate-level  
382 factors associated with perinatal mortality in Nigeria: evidence from a nationwide household  
383 survey. *BMC public health*. 2019;19(1):811.
- 384 16. Benjamin A, Sengupta P, Singh S. Perinatal mortality and its risk factors in Ludhiana: a  
385 population-based prospective cohort study. *Health and Population: Perspectives and Issues*.  
386 2009;32(1):12-20.
- 387 17. Al Kibria GM, Burrowes V, Choudhury A, Sharmeen A, Ghosh S, Mahmud A, et al.  
388 Determinants of early neonatal mortality in Afghanistan: an analysis of the Demographic and  
389 Health Survey 2015. *Globalization and health*. 2018;14(1):47.
- 390 18. Woldeamanuel BT, Gelebo KK. Statistical analysis of socioeconomic and demographic  
391 correlates of perinatal mortality in Tigray region, Ethiopia: a cross sectional study. *BMC public*  
392 *health*. 2019;19(1):1301.
- 393 19. Csa IJEd, health survey AA, Ethiopia, Calverton M, USA. Central statistical agency  
394 (CSA)[Ethiopia] and ICF. 2016;1.
- 395 20. CSA IJAA, Ethiopia, Calverton M, USA: Central Statistical Agency, International I.  
396 Ethiopia demographic and health survey 2011. 2012;430.
- 397 21. Demographic EJE, Calverton. Health Survey 2005: Addis Ababa. 2006.
- 398 22. Yadeta TA, Mengistu B, Gobena T, Regassa LD. Spatial pattern of perinatal mortality and  
399 its determinants in Ethiopia: Data from Ethiopian Demographic and Health Survey 2016. *PloS*  
400 *one*. 2020;15(11):e0242499.
- 401 23. Powers DA, Yoshioka H, Yun M-SJTSJ. mvdcmp: Multivariate decomposition for  
402 nonlinear response models. 2011;11(4):556-76.
- 403 24. Jena BH, Biks GA, Gelaye KA, Gete YKJBp, childbirth. Magnitude and trend of perinatal  
404 mortality and its relationship with inter-pregnancy interval in Ethiopia: a systematic review and  
405 meta-analysis. 2020;20:1-13.
- 406 25. Medhanyie A, Spigt M, Kifle Y, Schaay N, Sanders D, Blanco R, et al. The role of health  
407 extension workers in improving utilization of maternal health services in rural areas in Ethiopia: a  
408 cross sectional study. 2012;12(1):1-9.
- 409 26. Regassa NJAhs. Antenatal and postnatal care service utilization in southern Ethiopia: a  
410 population-based study. 2011;11(3).
- 411 27. Mrisho M, Obrist B, Schellenberg JA, Haws RA, Mushi AK, Mshinda H, et al. The use of  
412 antenatal and postnatal care: perspectives and experiences of women and health care providers in  
413 rural southern Tanzania. 2009;9:1-12.
- 414 28. Tesfaunegn EJAASAFD, Cooperation. Urban and Peri-urban development dynamics in  
415 EthiopiaSwiss Agency for Development and CooperationUrban and Periurban development  
416 dynamics in Ethiopia. 2017.
- 417 29. Harpham TJSs, medicine. Urbanization and mental health in developing countries: a  
418 research role for social scientists, public health professionals and social psychiatrists.  
419 1994;39(2):233-45.
- 420 30. Shiferaw K, Mengiste B, Gobena T, Dheresa MJPo. The effect of antenatal care on  
421 perinatal outcomes in Ethiopia: A systematic review and meta-analysis. 2021;16(1):e0245003.
- 422 31. Singh A, Pallikadavath S, Ogollah R, Stones WJPo. Maternal tetanus toxoid vaccination  
423 and neonatal mortality in rural north India. 2012;7(11):e48891.
- 424 32. Akinyemi JO, Solanke BL, Odimegwu COJAogh. Maternal employment and child survival  
425 during the era of sustainable development goals: Insights from proportional hazards modelling of  
426 Nigeria birth history data. 2018;84(1):15.

- 427 33. Organization WH. Maternal education and child health in the Western Pacific Region.  
428 1995.
- 429 34. Yakoob MY, Ali MA, Ali MU, Imdad A, Lawn JE, Van Den Broek N, et al. The effect of  
430 providing skilled birth attendance and emergency obstetric care in preventing stillbirths.  
431 2011;11:1-8.
- 432 35. Singh K, Brodish P, Suchindran CJM, journal ch. A regional multilevel analysis: can  
433 skilled birth attendants uniformly decrease neonatal mortality? 2014;18:242-9.

434

435

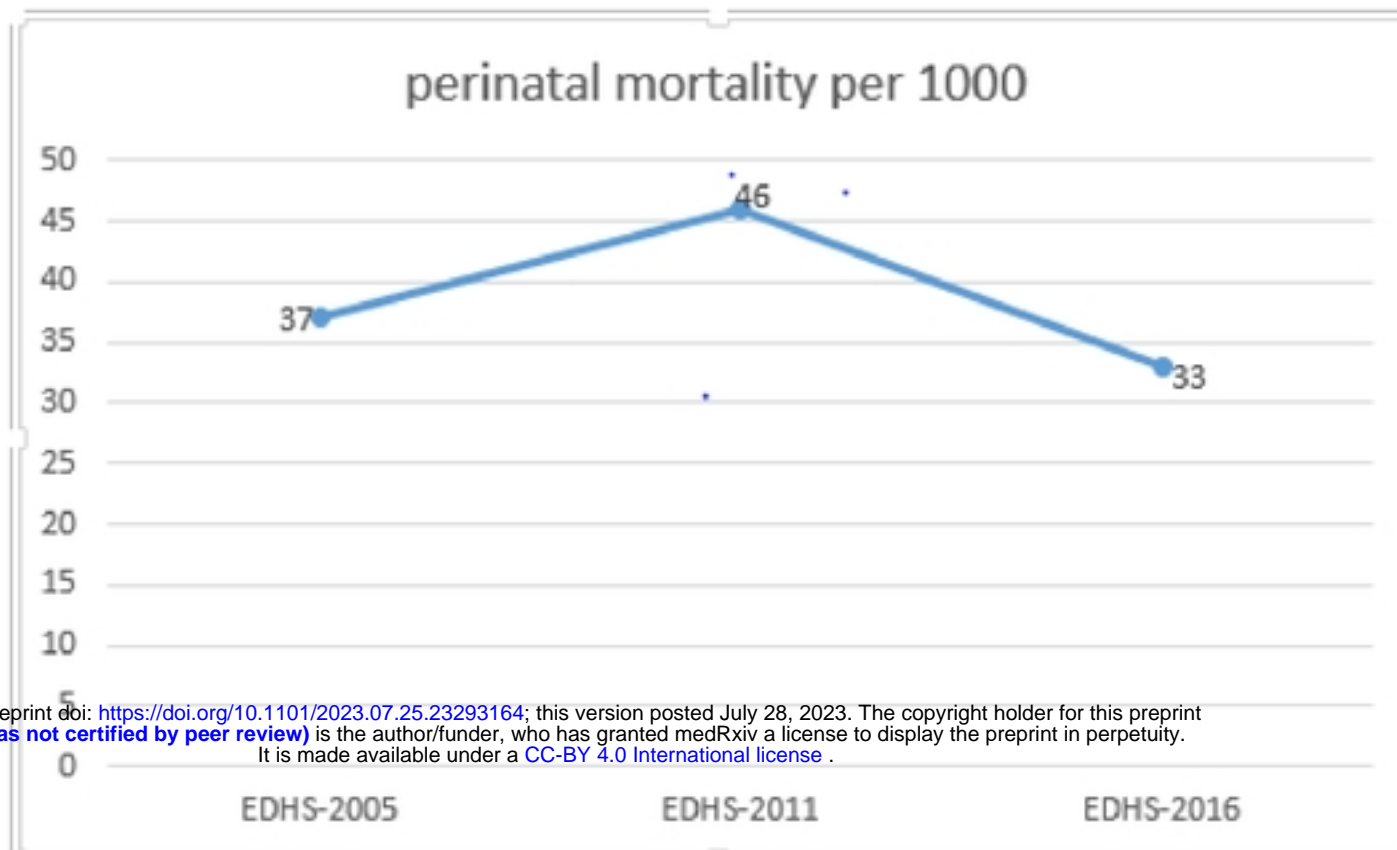

medRxiv preprint doi: <https://doi.org/10.1101/2023.07.25.23293164>; this version posted July 28, 2023. The copyright holder for this preprint (which was not certified by peer review) is the author/funder, who has granted medRxiv a license to display the preprint in perpetuity. It is made available under a [CC-BY 4.0 International license](https://creativecommons.org/licenses/by/4.0/).

**Figure-1: trend of perinatal mortality in Ethiopia from EDHS 2005 to EDHS 2016**

Moran's Index: -0.057710

z-score: -0.269571

p-value: 0.787490

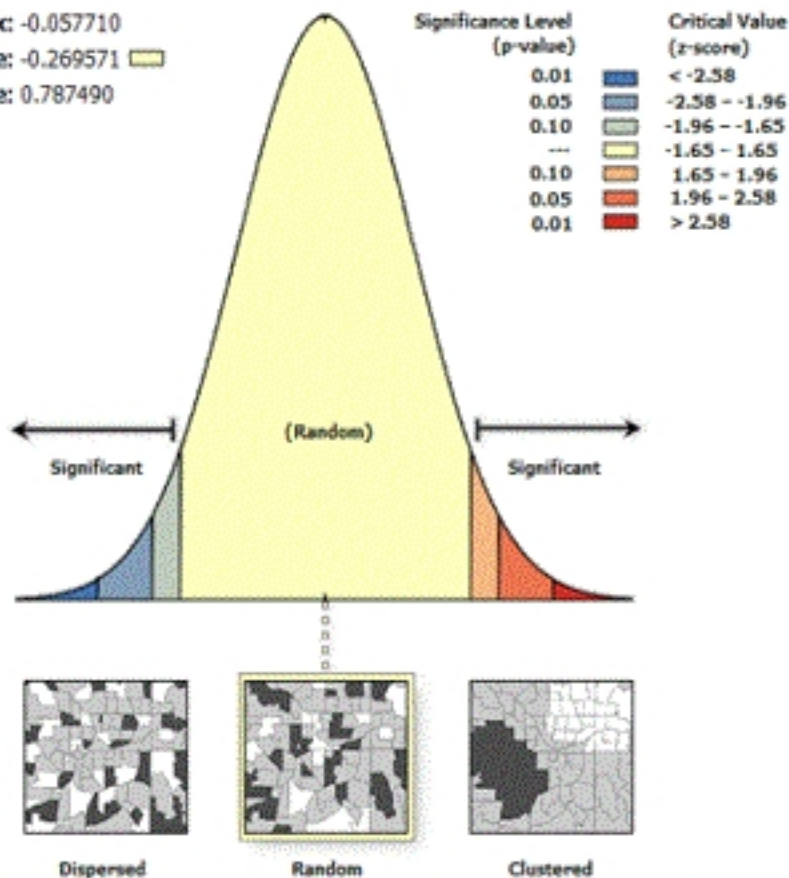

Given the z-score of -0.269571461753, the pattern does not appear to be significantly different than random.

Fig-2: Spatial autocorrelation of perinatal mortality in Ethiopia using 2005 EDHS.

Moran's Index: -0.027777

z-score: -0.473613

p-value: 0.635776

Significance Level  
(p-value)

| Significance Level (p-value) | Critical Value (z-score) |
|------------------------------|--------------------------|
| 0.01                         | < -2.58                  |
| 0.05                         | -2.58 - -1.96            |
| 0.10                         | -1.96 - -1.65            |
| ---                          | -1.65 - 1.65             |
| 0.10                         | 1.65 - 1.96              |
| 0.05                         | 1.96 - 2.58              |
| 0.01                         | > 2.58                   |

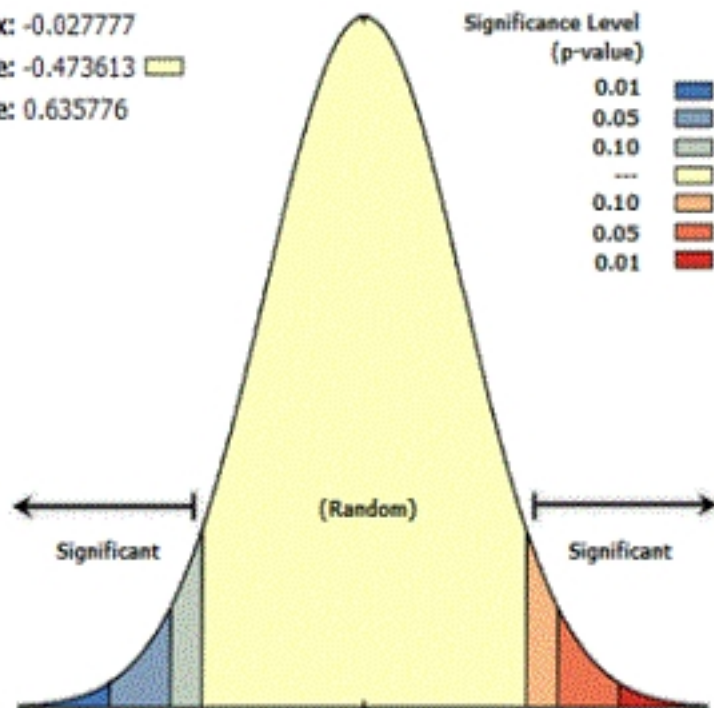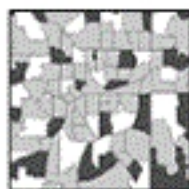

Dispersed

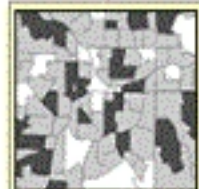

Random

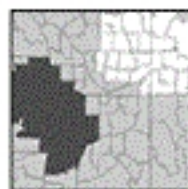

Clustered

Given the z-score of -0.473613393929, the pattern does not appear to be significantly different than random.

Fig-3: Spatial autocorrelation of perinatal mortality in Ethiopia using 2011 EDHS.

**Table-1: socio demographic characteristics of the participants in 2005, 2011 and 2016 EDHS.**

| Variable                   |                                | Weighted frequency (%) |               |                |              |
|----------------------------|--------------------------------|------------------------|---------------|----------------|--------------|
|                            |                                | 2005(N=12037)          | 2011(N=10588) | 2016(N=11375)  |              |
| Women age                  | <20                            | 576 (4.8%)             | 361 (3.4%)    | 374 (3.3%)     |              |
|                            | 20-29                          | 5825 (48.4%)           | 5429 (51.3%)  | 5599 (49.2%)   |              |
|                            | 30-39                          | 4344 (36.1%)           | 3823 (36%)    | 4382 (38.5%)   |              |
|                            | 40-49                          | 1292 (10.7%)           | 985 (9.3%)    | 1020 (9%)      |              |
| Residence                  | Urban                          | 883 (7.3%)             | 1406 (13.3%)  | 1229 (10.8%)   |              |
|                            | Rural                          | 11,154 (92.7%)         | 9182 (86.7%)  | 10,146 (89.2%) |              |
| Region                     | Tigray                         | 775 (6.4%)             | 678 (6.4%)    | 709 (6.2%)     |              |
|                            | Afar                           | 122 (0.01%)            | 114 (1.1%)    | 119 (1%)       |              |
|                            | Amhara                         | 2827(23.5%)            | 2538 (24%)    | 2121 (18.6%)   |              |
|                            | Oromia                         | 4666 (38.8%)           | 4291 (40.6%)  | 4997 (43.9%)   |              |
|                            | Somalia                        | 522 (4.3%)             | 296 (2.8%)    | 554 (4.9%)     |              |
|                            | Benishangul                    | 115 (0.9%)             | 131 (1.2%)    | 133(1.3%)      |              |
|                            | SNNPRs                         | 2742 (22.8%)           | 2248 (21.2%)  | 2402 (21.1%)   |              |
|                            | Harari                         | 23 (0.2%)              | 27 (0.2%)     | 27 (0.2%)      |              |
|                            | Addis Ababa                    | 170 (1.5%)             | 192 (1.8%)    | 234 (2.1%)     |              |
|                            | Dire Dawa                      | 41 (0.3%)              | 35 (0.3%)     | 49 (0.4%)      |              |
|                            | Gambela                        | 34 (0.03%)             | 38 (0.4%)     | 29 (0.3%)      |              |
|                            | Religion                       | Orthodox               | 5094 (42.3%)  | 4233 (40%)     | 3844 (33.8%) |
|                            |                                | Muslim                 | 4123 (34.3%)  | 3563 (33.7%)   | 4696 (41.3%) |
|                            |                                | Others                 | 2820 (23.4%)  | 2792 (26.3%)   | 2835 (24.9%) |
| Maternal educational level | No education                   | 9541 (79.3%)           | 7404 (69.9%)  | 7606 (66.9%)   |              |
|                            | Primary education              | 1993 (16.5%)           | 2801(26.5%)   | 2961 (26%)     |              |
|                            | Secondary and higher education | 503 (4.2%)             | 383 (3.6%)    | 808 (7.1%)     |              |
| Wealth index               | Poorest                        | 2646 (22%)             | 2421(22.9%)   | 2483 (21.8%)   |              |
|                            | Poorer                         | 2497(20.7%)            | 2382 (22.5%)  | 2877 (25.3%)   |              |
|                            | Middle                         | 2607 (21.7%)           | 2151 (20.3%)  | 2318 (20.4%)   |              |

medRxiv preprint doi: <https://doi.org/10.1101/2023.07.25.23293164>; this version posted July 28, 2023. The copyright holder for this preprint (which was not certified by peer review) is the author/funder, who has granted medRxiv a license to display the preprint in perpetuity. It is made available under a [CC-BY 4.0 International license](https://creativecommons.org/licenses/by/4.0/).

|                     |                     |              |              |              |
|---------------------|---------------------|--------------|--------------|--------------|
|                     | Richer              | 2468 (20.5%) | 2018(19.1%)  | 2084 (18.3%) |
|                     | Richest             | 1819 (15.1%) | 1616 (15.3%) | 1613 (14.2%) |
| Parent's education  | No education        | 3458(28.7%)  | 2598 (24.5%) | 3201(28.1%)  |
|                     | Primary             | 4568 (38%)   | 6201(58.6%)  | 4562(40.1%)  |
|                     | Secondary education | 4011(33.3%)  | 1789 (16.9%) | 3612 (31.8%) |
| Parent's occupation | No work             | 2177(18.1%)  | 2346 (22.2%) | 1457 (12.8%) |
|                     | Non agricultural    | 6052(50.3%)  | 5468 (51.6%) | 5901(51.9%)  |
|                     | Agricultural        | 3808(31.6%)  | 2774 (26.2%) | 4017 (35.3%) |
| Mother occupation   | No occupation       | 4348 (36%)   | 4861(45.9%)  | 6352 (55.8%) |
|                     | Had occupation      | 7689 (64%)   | 5727 (54.1%) | 5023 (44.2%) |

medRxiv preprint doi: <https://doi.org/10.1101/2023.07.25.23293164>; this version posted July 28, 2023. The copyright holder for this preprint (which was not certified by peer review) is the author/funder, who has granted medRxiv a license to display the preprint in perpetuity. It is made available under a [CC-BY 4.0 International license](https://creativecommons.org/licenses/by/4.0/).



**Table-2: distribution of environmental and health service related characteristics of respondents in 2005, 2011 and 2016 EDHS**

| Variable                   |                  | Weighted frequency (%) |               |               |
|----------------------------|------------------|------------------------|---------------|---------------|
|                            |                  | 2005(N=12037)          | 2011(N=10588) | 2016(N=11375) |
| Source of drinking water   | Piped            | 2576(21.4%)            | 1361 (12.9%)  | 1924 (16.9%)  |
|                            | Protected        | 5825 (48.4%)           | 5404 (51%)    | 5519 (48.5%)  |
|                            | Unprotected      | 3636 (30.2%)           | 3823 (36.1%)  | 3932 (34.6%)  |
| Use of toilet facilities   | Yes              | 11154 (92.7%)          | 9182 (86.7%)  | 10750 (94.5%) |
|                            | No               | 883 (7.3%)             | 1406 (13.3%)  | 625 (5.5%)    |
| Type of cooking fuel       | Solid            | 7752 (64.4%)           | 6789 (64%)    | 6701 (58.9%)  |
|                            | Non solid        | 4285(35.6%)            | 3789 (36%)    | 4674 (41.1%)  |
| Delivery assistance        | Non skilled      | 5890 (49%)             | 4025 (38%)    | 2678 (23.5%)  |
|                            | Skilled          | 5147 (51%)             | 6563 (62%)    | 8697 (76.5%)  |
| Mode of delivery           | Vaginal          | 10036 (83.4%)          | 7687 (72.6%)  | 8606 (75.7%)  |
|                            | Cesarean-section | 2001 (16.6%)           | 2901 (27.4%)  | 2769 (24.3%)  |
| ANC utilization            | Yes              | 5211(43.3%)            | 6524 (61.6%)  | 8900 (78.2%)  |
|                            | No               | 6826 (56.7%)           | 4064 (38.4%)  | 2475 (21.8%)  |
| Tetanus vaccination status | Not use          | 2123(17.7%)            | 2620 (24.7%)  | 1890 (16.6%)  |
|                            | 1 dose           | 5579(45.3%)            | 4900 (46.3%)  | 4005 (35.2%)  |
|                            | ≥2 doses         | 4335(36%)              | 3068 (29%)    | 4480 (39.4%)  |

medRxiv preprint doi: <https://doi.org/10.1101/2023.07.25.23293164>; this version posted July 28, 2023. The copyright holder for this preprint (which was not certified by peer review) is the author/funder, who has granted medRxiv a license to display the preprint in perpetuity. It is made available under a [CC-BY 4.0 International license](https://creativecommons.org/licenses/by/4.0/).

**Table-3: Fetal/neonatal and maternal behavior related characteristics of respondents in 2005, 2011 and 2016 EDHS**

| Variable          |            | Weighted frequency (%) |               |               |
|-------------------|------------|------------------------|---------------|---------------|
|                   |            | 2005(N=12037)          | 2011(N=10588) | 2016(N=11375) |
| Birth interval    | <24 months | 4212 (35%)             | 3565 (33.7%)  | 2776 (24.4%)  |
|                   | ≥24 months | 7825 (65%)             | 7023 (66.3%)  | 8599 (75.6%)  |
| Sex of child      | Female     | 5987 (49.7%)           | 5067 (47.9%)  | 5897 (51.8%)  |
|                   | Male       | 6050 (50.3%)           | 5521(52.1%)   | 5478 (49.2%)  |
| Birth order       | ≤3         | 3679 (30.6%)           | 3101((29.3%)  | 2989 (26.3%)  |
|                   | 4-5        | 4356 (36.2%)           | 3780 (35.7%)  | 5231(46%)     |
| Types of births   | Single     | 10836 (90%)            | 9602 (90.7%)  | 10186 (89.5%) |
|                   | Multiple   | 1201 (10%)             | 986 (9.3%)    | 1189 (10.5%)  |
| Smoking cigarette | Yes        | 256 (21.3%)            | 189 (17.8%)   | 126 (1.1%)    |
|                   | No         | 11781(78.7%)           | 10399 (81.2%) | 11249 (98.9%) |

medRxiv preprint doi: <https://doi.org/10.1101/2023.07.25.23293164>; this version posted July 28, 2023. The copyright holder for this preprint (which was not certified by peer review) is the author/funder, who has granted medRxiv a license to display the preprint in perpetuity. It is made available under a [CC-BY 4.0 International license](https://creativecommons.org/licenses/by/4.0/).

**Table-4: Trends in perinatal mortality rate among women's who gave birth in the last five years prior to the surveys by selected characteristics 2005, 2011, and 2016 EDHS**

|                                       |                      | 2005<br>(N=12037) | 2011<br>(N=10588) | 2016<br>(N=11375) | % difference in<br>perinatal mortality |                    |                    |       |
|---------------------------------------|----------------------|-------------------|-------------------|-------------------|----------------------------------------|--------------------|--------------------|-------|
|                                       |                      |                   |                   |                   | 2011<br>to<br>2005                     | 2016<br>to<br>2011 | 2016<br>to<br>2005 |       |
| Women<br>age                          | <20                  | 13.9              | 12.3              | 8.9               | -1.6                                   | -3.4               | -5                 |       |
|                                       | 20-29                | 17.9              | 19.4              | 6.7               | 1.5                                    | -12.7              | -11.2              |       |
|                                       | 30-39                | 23.1              | 21.4              | 12.2              | -1.7                                   | -9.2               | -10.9              |       |
|                                       | 40-49                | 11.7              | 2                 | 8.9               | -9.7                                   | 6.9                | -2.8               |       |
| Residen<br>ce                         | Urban                | 22.3              | 16.6              | 6.6               | -5.7                                   | -10                | -15.7              |       |
|                                       | Rural                | 39.3              | 46.6              | 34.6              | 7.3                                    | -12                | -4.7               |       |
| Region                                | Tigray               | 2.6               | 12                | 5.7               | 9.4                                    | -6.3               | 3.1                |       |
|                                       | Afar                 | 8.9               | 9.2               | 10.6              | 0.3                                    | 1.4                | 1.7                |       |
|                                       | Amhara               | 47.1              | 17.2              | 6.6               | -29.9                                  | -10.6              | -40.5              |       |
|                                       | Oromia               | 14.8              | 16.1              | 9.3               | 1.3                                    | -6.8               | -6.8               |       |
|                                       | Somalia              | 22.1              | 48.2              | 18.9              | 26.1                                   | -29.2              | -3.2               |       |
|                                       | Benishangul          | 40.1              | 24.6              | 29.1              | -15.5                                  | 4.5                | -11                |       |
|                                       | SNNPRs               | 29.9              | 32.4              | 21.7              | 2.5                                    | -10.7              | -8.2               |       |
|                                       | Harari               | 23                | 27                | 21.8              | 4                                      | -5.2               | -1.2               |       |
|                                       | Addis<br>Ababa       | 5.9               | 2.3               | 1.9               | -3.9                                   | -0.4               | -4                 |       |
|                                       | Dire Dawa            | 17.8              | 13.1              | 8.9               | -4.7                                   | -4.2               | -8.9               |       |
|                                       | Gambela              | 3.4               | 6.9               | 2.2               | 3.5                                    | -4.7               | -1.2               |       |
|                                       | Religion             | Orthodox          | 3.9               | 39.4              | 34.9                                   | 35.5               | -4.5               | 31    |
|                                       |                      | Muslim            | 19.4              | 13.4              | 5.3                                    | -6                 | -8.1               | -14.1 |
| Others                                |                      | 16.2              | 36.8              | 19.4              | 20.6                                   | -17.4              | 3.2                |       |
| Materna<br>l<br>educatio<br>nal level | No<br>education      | 34.2              | 25.8              | 17.3              | -8.4                                   | -8.4               | -16.9              |       |
|                                       | Primary<br>education | 32.6              | 34.5              | 31.7              | 1.9                                    | -2.8               | -0.9               |       |

medRxiv preprint doi: <https://doi.org/10.1101/2023.07.25.23293164>; this version posted July 28, 2023. The copyright holder for this preprint (which was not certified by peer review) is the author/funder, who has granted medRxiv a license to display the preprint in perpetuity. It is made available under a [CC-BY 4.0 International license](https://creativecommons.org/licenses/by/4.0/).

medRxiv preprint doi: <https://doi.org/10.1101/2023.07.25.23293164>; this version posted July 28, 2023. The copyright holder for this preprint (which was not certified by peer review) is the author/funder, who has granted medRxiv a license to display the preprint in perpetuity. It is made available under a [CC-BY 4.0 International license](#).

|                          |                     |      |      |      |       |       |       |
|--------------------------|---------------------|------|------|------|-------|-------|-------|
|                          | Secondary and above | 19.4 | 23.5 | 20.6 | 4.1   | -2.9  | 1.2   |
| Wealth index             | Poorest             | 38.5 | 49.2 | 32.6 | 10.5  | -16.6 | -5.9  |
|                          | Poorer              | 25.9 | 31.4 | 28.4 | 5.5   | -3    | 2.5   |
|                          | Middle              | 17.6 | 18.9 | 13.7 | 1.3   | -5.2  | -3.9  |
|                          | Richer              | 12.5 | 16.8 | 10.6 | 4.3   | -6.2  | -1.9  |
|                          | Richest             | 6.8  | 9.2  | 4.4  | 2.4   | -4.8  | -2.4  |
| Parent's education       | No education        | 23.4 | 28.2 | 18.6 | 4.8   | -9.6  | -4.8  |
|                          | Primary             | 24.4 | 25.6 | 13.9 | 1.2   | -12   | -10.5 |
|                          | Secondary education | 21.8 | 22.8 | 10.6 | 1     | -12.2 | -11.2 |
| Parent's occupation      | No work             | 34.7 | 36.3 | 16.7 | 1.6   | -19.6 | -18   |
|                          | Non agricultural    | 23.8 | 24.9 | 18.3 | 1.1   | -6.6  | -5.5  |
|                          | Agricultural        | 29.5 | 28.1 | 29.6 | -1.4  | 1.5   | 0.1   |
| Mother occupation        | No occupation       | 29.5 | 9.7  | 28.1 | -19.8 | 18.4  | -1.4  |
|                          | Had occupation      | 18.4 | 7.9  | 11.4 | -21.6 | 3.5   | -7    |
| Source of drinking water | Piped               | 25.4 | 28.9 | 12.4 | 3.5   | -16.5 | -13   |
|                          | Protected           | 12.7 | 21.2 | 19.8 | 8.5   | -1.4  | 7.1   |
|                          | Unprotected         | 32.8 | 23.5 | 18.2 | -9.3  | -5.3  | -14.3 |
| Use of toilet facilities | Yes                 | 36.7 | 23.6 | 12.9 | -13.1 | -10.7 | -23.8 |
|                          | No                  | 12.8 | 23.3 | 29.5 | 10.5  | 6.2   | 16.7  |
| Type of cooking fuel     | Solid               | 14.6 | 38.6 | 24.9 | 24    | -13.7 | 10.3  |
|                          | Non-solid           | 26.4 | 23.8 | 34.9 | -2.6  | 11.1  | 8.5   |
| Delivery assistance      | Non skilled         | 38.4 | 43.6 | 31.4 | 5.2   | -12.2 | -7    |
|                          | Skilled             | 13.7 | 13.2 | 11.8 | -0.5  | -1.4  | -1.9  |
| Mode of delivery         | Vaginal             | 20.1 | 38.9 | 27.7 | 18.8  | -11.2 | 7.6   |
|                          | Cesarean section    | 25.8 | 44.8 | 29.6 | 19    | -15.2 | 3.8   |
| ANC utilization          | Yes                 | 3.6  | 9.6  | 2.4  | 6     | -7.2  | -1.2  |
|                          | No                  | 39.2 | 47.1 | 25.2 | 7.9   | -21.9 | -14   |

|                            |            |                |                |               |       |       |       |
|----------------------------|------------|----------------|----------------|---------------|-------|-------|-------|
| Tetanus vaccination status | Not use    | 31.4           | 51.1           | 23.9          | 19.7  | -27.2 | -7.5  |
|                            | 1 dose     | 28.9           | 41.2           | 27.4          | 12.3  | -13.8 | -1.5  |
|                            | ≥2 doses   | 29.1           | 23.2           | 12.3          | -5.9  | -10.9 | -16.8 |
| Birth interval             | <24 months | 29.2           | 48.1           | 35.6          | 18.9  | -12.5 | 6.4   |
|                            | ≥24 months | 21.8           | 32.2           | 27.9          | 10.4  | -4.3  | 6.1   |
| Sex of child               | Female     | 34.8           | 37.8           | 23.8          | 3     | -14   | -11   |
|                            | Male       | 36.2           | 29.3           | 19.3          | -6.9  | -10   | -16.9 |
| Birth order                | ≤3         | 36.3           | 44.4           | 19            | 8.1   | -25.4 | -17.3 |
|                            | 4-5        | 39.3           | 26.2           | 39.9          | -13.1 | 13.7  | 0.6   |
|                            |            | 36             | 39             | 31            | -3    | -6    | -8    |
| Types of births            | Single     | 12             | 9.8            | 11.9          | -2.2  | 2.1   | -0.1  |
|                            | Multiple   | 38.3           | 28.9           | 18.8          | -9.4  | -10.1 | -19.5 |
| Smoking cigarette          | Yes        | 18.5           | 23.5           | 12.6          | 5     | -10.9 | -5.9  |
|                            | No         | 37.8           | 40.1           | 43.4          | 2.3   | 3.3   | 5.6   |
| Overall rate               |            | 37 (32.6-41.4) | 46(39.2-52.8%) | 33(27.8-38.2) |       |       |       |

medRxiv preprint doi: <https://doi.org/10.1101/2023.07.25.23293164>; this version posted July 28, 2023. The copyright holder for this preprint (which was not certified by peer review) is the author/funder, who has granted medRxiv a license to display the preprint in perpetuity. It is made available under a [CC-BY 4.0 International license](https://creativecommons.org/licenses/by/4.0/).

**Table-5: Overall decomposition analysis of change in perinatal mortality in Ethiopia 2005–2016.**

| Perinatal mortality | Coefficient | 95% CI             | p-value | Pct. |
|---------------------|-------------|--------------------|---------|------|
| <b>E</b>            | -0.0083     | (-0.0157, -0.001)  | 0.026   | 83.3 |
| <b>C</b>            | -0.00167    | (-0.0031,-0.00025) | 0.02    | 16.7 |
| <b>R</b>            | -0.01       | -0.017, -0.0029    | 0.006   |      |

Note E= Endowment

C=Coefficient

R=Residual

medRxiv preprint doi: <https://doi.org/10.1101/2023.07.25.23293164>; this version posted July 28, 2023. The copyright holder for this preprint (which was not certified by peer review) is the author/funder, who has granted medRxiv a license to display the preprint in perpetuity. It is made available under a [CC-BY 4.0 International license](https://creativecommons.org/licenses/by/4.0/).

**Table-6: detailed decomposition analysis of perinatal mortality in Ethiopia from 2005 -2016.**

| Experiencing perinatal mortality |                     | Difference due to characteristics (E) |         |        | Difference due to coefficient (C) |         |        |
|----------------------------------|---------------------|---------------------------------------|---------|--------|-----------------------------------|---------|--------|
|                                  |                     | Coef.                                 | p-value | Pct.   | Coef.                             | p-value | Pct.   |
| Mode of delivery                 | Vaginal delivery    |                                       |         |        |                                   |         |        |
|                                  | Cesarean section    | -0.000042<br>(-0.00039, 0.00031)      | 0.59    | 2.8    | -0.00031<br>(-0.0008,0.0014)      | 0.812   | -0.39  |
| ANC                              | Yes                 | -0.002164<br>(-0.0035, -0.00358)      | 0.001   | -19.83 | -0.00358<br>(-0.0089,0.0018)      | 0.193   | -32.84 |
|                                  | No                  |                                       |         |        |                                   |         |        |
| TT vaccine uptake status         | 1                   | -0.00072<br>(-0.0012, -0.0011)        | 0.007   | -6.6   | -0.00036<br>(-0.0028,0.0021)      | 0.77    | -3.38  |
|                                  | ≥2                  | -0.0019<br>(-0.0028, -0.0011)         | <0.001  | -17.8  | -0.0011<br>(-0.0064,-0.0041)      | 0.67    | -10.44 |
| Place of residence               | Urban               | -0.000499<br>(-0.0009, -0.00007)      | 0.02    | -4.59  | -0.0073<br>(-0.01, 0.025)         | 0.419   | 65.24  |
|                                  | Rural               |                                       |         |        |                                   |         |        |
| Maternal occupation              | Occupation          | -0.019<br>(-0.0033, -0.00061)         | 0.004   | -18.1  | 0.0082<br>(-0.0043,0.021)         | 0.2     | 75.13  |
|                                  | No occupation       |                                       |         |        |                                   |         |        |
| Maternal education               | No education        |                                       |         |        |                                   |         |        |
|                                  | Primary education   | 0.00033<br>(-0.0002, 0.0027)          | 0.78    | -0.33  | -0.00094<br>(-0.0041,0.0022)      | 0.56    | 9.4    |
|                                  | Secondary education | 0.0023<br>(0.000046, 0.0041)          | 0.014   | -2.31  | -0.0016<br>(-0.0074,0.0041)       | 0.58    | 16.4   |
| Delivery assistance              | Skilled             | 0.0069<br>(0.00068, 0.013)            | 0.03    | -69    | 0.000099<br>(0.00002,0.00018)     | 0.013   | -0.98  |
|                                  | Non skilled         |                                       |         |        |                                   |         |        |
| Total                            |                     |                                       |         | 83.3   |                                   |         | 16.7   |
| Constant                         |                     |                                       |         |        | -0.0045<br>(-0.0023,-0.0098)      |         |        |

medRxiv preprint doi: <https://doi.org/10.1101/2023.07.25.23293164>; this version posted July 28, 2023. The copyright holder for this preprint (which was not certified by peer review) is the author/funder, who has granted medRxiv a license to display the preprint in perpetuity. It is made available under a [CC-BY 4.0 International license](https://creativecommons.org/licenses/by/4.0/).
